# Supplementary figures and images for: Synthesis, characterization, and electrical, electrochemical and gas sensing properties of a novel ball-type four t-butylcalix[4]arene bridged binuclear zinc(ii) phthalocyanine
Source: Royal Society of Chemistry journal article supplement (doi:10.1039/b510225a), 2005-11-21

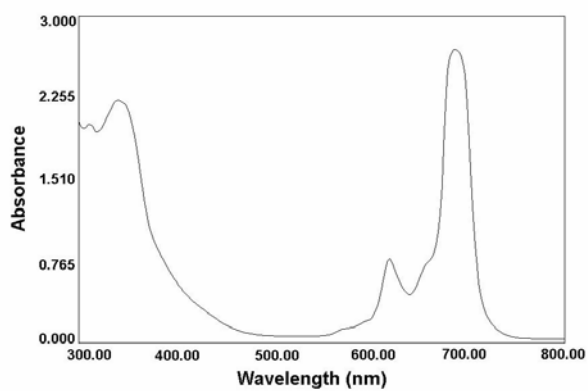

**Fig. 1** Absorption spectrum of **2** in chloroform.

Supplement: b510225a.pdf [file b510225a.pdf]
